# Supplementary material for: Topological isomerism in coordination polymers
Source: Royal Society of Chemistry journal article supplement (doi:10.1039/b103612m), 2001-01-01
Supplement: b103612m.doc [file b103612m.doc]

# Supplementary Information

# Experimental

**Synthesis of [CuI(bpds)] 1:** A solution of CuI (221mg, 1.16mmol) in MeCN (50ml) was added to a solution of bpds (255mg, 1.16mmol) in CH2Cl2 (20ml). A yellow precipitate formed immediately and, after stirring for 1hr, was filtered off, washed with MeCN and dried *in vacuo*. Yield: 438mg, 92%. CHN: Found (calc. for C10H8CuIN2S2) C 29.20 (29.24), H 1.91 (1.96), N 6.86 (6.82) %. IR (KBr) /cm-1: 3073w, 3037w, 3017w, 1581s, 1477s, 1384w, 1215m, 1060m, 808s, 709s, 668w, 491m.

Crystals suitable for X-ray diffraction were grown by the slow diffusion between layered solutions of CuI in MeCN ot EtCN and bpds in CH2Cl2. Regardless of the stoichiometry of the reactants the 1:1 product formed in the bpds rich region and the 2:1 product formed in the CuI rich region.

**Synthesis of [(CuI)2(bpds)] 2**: A solution of CuI (100mg, 0.52mmol) in EtCN (20ml) was added to a solution of bpds (58mg, 0.26mmol) in CH2Cl2 (20ml). A yellow precipitate formed immediately and, after stirring for 1hr, was filtered off, washed with MeCN and dried *in vacuo*. Yield: 103mg, 65%. CHN: Found (calc. for C10H8Cu2I2N2S2) C 21.00 (19.98), H 1.33 (1.34), N 4.66 (4.66) %. IR (KBr) /cm-1: 3041w, 1581s, 1410s, 1315w, 1215m, 1060m, 1013w, 807s, 491m.

Crystals suitable for X-ray diffraction were grown by the slow diffusion between layered solutions of CuI in EtCN and bpds in CH2Cl2. Regardless of the stoichiometry of the reactants the 1:1 product formed in the bpds rich region and the 2:1 product formed in the CuI rich region.

**Synthesis of [(CuI)2(bpds)] 3**: A solution of CuI (100mg, 0.52mmol) in MeCN (20ml) was added to a solution of bpds (58mg, 0.26mmol) in CH2Cl2 (20ml). A yellow precipitate formed immediately and, after stirring for 1hr, was filtered off, washed with MeCN and dried *in vacuo*. Yield: 98mg, 62%. CHN: Found (calc. for C10H8Cu2I2N2S2) C 20.38 (19.98), H 1.43 (1.34), N 4.99 (4.66) %. IR (KBr) /cm-1: 3055w, 3015w, 1540s, 1477s, 1256m, 1097w, 885m, 710s, 506m.

Crystals suitable for X-ray diffraction were grown by the slow diffusion between layered solutions of CuI in MeCN and bpds in CH2Cl2. Regardless of the stoichiometry of the reactants the 1:1 product formed in the bpds rich region and the 2:1 product formed in the CuI rich region.

The small discrepancies in the elemental analyses of compounds **2** and **3** can be accounted for by a traces of residual solvent (see main text).
